# Supplementary material for: Perinatal Maternal Depressive Symptoms as an Issue for Population Health
Source: Atypon-hosted journal article supplement (doi:10.1176/appi.ajp.2018.17091031), 2018-08-02
Supplement: appi.ajp.2018.17091031.ds001.pdf [file appi.ajp.2018.17091031.ds001.pdf]

 


Psychiatry Online
